# Supplementary material
Source: ML conference proceedings conference paper supplement (https://proceedings.neurips.cc/paper_files/paper/2022/hash/b9e472cd579c83e2f6aa3459f46aac28-Abstract.html)
Supplement: Supplementary file 1 [file b9e472cd579c83e2f6aa3459f46aac28-Supplemental-Conference.pdf]

## A Further Related Work

**Batched algorithms for multi-armed bandits.** Batched processing for the stochastic multi-armed bandit problem has been investigated in the past few years. A special case when there are two bandits was studied by [39]. They obtain a worst-case regret bound of  $O\left(\left(\frac{T}{\log(T)}\right)^{1/B} \frac{\log(T)}{\Delta_{\min}}\right)$ . [25] studied the general problem and obtained a worst-case regret bound of  $O\left(\frac{K \log(K) T^{1/B} \log(T)}{\Delta_{\min}}\right)$ , which was later improved by [23] to  $O\left(\frac{K T^{1/B} \log(T)}{\Delta_{\min}}\right)$ . Furthermore, [23] obtained an instance-dependent regret bound of  $\sum_{j: \Delta_j > 0} T^{1/B} O\left(\frac{\log(T)}{\Delta_j}\right)$ . Our results for batched dueling bandits are of a similar flavor; that is, we get a similar dependence on  $T$  and  $B$ . [23] also give batched algorithms for stochastic linear bandits and adversarial multi-armed bandits.

**Adaptivity in combinatorial optimization.** Adaptivity and batch processing has been recently studied for stochastic submodular cover [27, 1, 24, 26], and for various stochastic “maximization” problems such as knapsack [20, 13], matching [10, 12], probing [30] and orienteering [28, 29, 11]. Recently, there have also been several results examining the role of adaptivity in (deterministic) submodular optimization; e.g. [8, 6, 9, 7, 17].

## B Missing Proofs from §3.1

*Proof of Lemma 3.1* Note that  $\mathbb{E}[\hat{p}_{i,j}(r)] = p_{i,j}$ , and applying Hoeffding’s inequality gives

$$\mathbf{P}\left(|\hat{p}_{i,j}^{r+1} - p_{i,j}| > \gamma_{i,j}(r)\right) \leq 2 \exp\left(-2N_{i,j}(r) \cdot \gamma_{i,j}(r)^2\right) \leq 2\eta.$$

□

*Proof of Lemma 3.2* Applying Lemma 3.1 and taking a union bound over all pairs and batches, we get that the probability that some estimate is incorrect is at most  $\binom{K}{2} \times B \times 2\eta \leq \frac{1}{T}$  where  $\eta = 1/K^2 BT$ . Thus,  $\mathbf{P}(\bar{G}) \leq \frac{1}{T}$ . □

*Proof of Lemma 3.3* In C2B, an arm  $j$  is deleted in batch  $r$  iff there is an arm  $i \in \mathcal{A}$  with  $\hat{p}_{i,j}(r) > \frac{1}{2} + 2\gamma_{i,j}(r)$ . If  $a^*$  is eliminated due to some arm  $j$ , then by definition of event  $G$ , we get  $p_{j,a^*} > \frac{1}{2} + \gamma_{i,j}(r) > \frac{1}{2}$ , a contradiction. □

## C Missing Proofs from §3.1.1

*Proof of Lemma 3.4* For any pair  $i, j$  of arms and round  $r$ , let  $B_{i,j}(r)$  denote the event that  $|\hat{p}_{i,j}(r) - p_{i,j}| > c_{i,j}(r)$ . Note that  $N_{ij}(r) \leq \sum_{s=1}^r q_s \leq 2q_r$ . For any integer  $n$ , let  $s_{ij}(n)$  denote the sample average of  $n$  independent Bernoulli r.v.s with probability  $p_{ij}$ . By Hoeffding’s bound,

$$\mathbf{P}[|s_{ij}(n) - p_{ij}| > c] \leq 2e^{-2nc^2}, \quad \text{for any } c \in [0, 1].$$

We now bound

$$\begin{aligned} \mathbf{P}[B_{ij}(r)] &\leq \sum_{n=0}^{2q_r} \mathbf{P}[B_{ij}(r) \wedge N_{ij}(r) = n] \\ &\leq \sum_{n=0}^{2q_r} \mathbf{P}\left[|s_{ij}(n) - p_{ij}| > \sqrt{\frac{2 \log(2K^2 q_r)}{n}}\right] \leq \sum_{n=0}^{2q_r} 2 \exp\left(-2n \cdot \frac{2 \log(2K^2 q_r)}{n}\right) \\ &\leq 4q_r \cdot \frac{1}{(2K^2 q_r)^4} \leq \frac{1}{4K^2 \cdot q_r^2} \end{aligned}$$

The second inequality uses the definition of  $c_{ij}(r)$  when  $N_{ij}(r) = n$ . The last inequality uses  $K \geq 2$ . Next, by a union bound over arms and rounds, we can write the desired probability as

$$\begin{aligned}
\mathbf{P}(\exists r \geq C(\delta), i, j : B_{i,j}(r)) &\leq \sum_{r \geq C(\delta)} \sum_{i < j} \mathbf{P}(B_{i,j}(r)) \\
&\leq \sum_{r \geq C(\delta)} \binom{K}{2} \cdot \frac{1}{4K^2 \cdot q_r^2} \leq \sum_{r \geq C(\delta)} \frac{1}{8q_r^2} \\
&\leq \sum_{r \geq C(\delta)} \frac{1}{2q^{2r}} = \frac{1}{2q^{2C(\delta)}} \cdot \left(1 + \frac{1}{q^2} + \frac{1}{q^4} + \dots\right) \leq \frac{1}{q^{2C(\delta)}} \leq \delta
\end{aligned} \tag{4}$$

The second inequality above uses the bound on  $\mathbf{P}[B_{ij}(r)]$ . The first inequality in (4) uses  $q_r = \lfloor q^r \rfloor \geq q^r - 1 \geq \frac{q^r}{2}$  as  $q \geq 2$ . The last inequality in (4) uses the definition of  $C(\delta)$ .

The lemma now follows by the definition of event  $\neg E(\delta)$  as  $\exists r \geq C(\delta), i, j : B_{i,j}(r)$ .  $\square$

*Proof of Lemma 3.5* Fix any round  $r \geq C(\delta) + 1$ . Suppose that  $a^* \in D_r(i)$  for some other arm  $i$ . This implies that  $\widehat{p}_{i,a^*}(r-1) > \frac{1}{2} + c_{i,a^*}(r-1)$ . But under event  $E(\delta)$ , we have  $|\widehat{p}_{i,a^*}(r-1) - p_{i,a^*}| \leq c_{i,a^*}(r-1)$  because  $r-1 \geq C(\delta)$ . Combined, these two observations imply  $p_{i,a^*} > \frac{1}{2}$ , a contradiction.  $\square$

*Proof of Lemma 3.7* We first argue that  $a^*$  is compared to all active arms in each round  $r \geq r(\delta)$ . By Lemma 3.3, we know  $a^* \in \mathcal{A}$ . By Lemma 3.5, we have  $a^* \notin D_r(j)$  for all  $j \neq a^*$  because  $r \geq r(\delta) \geq 1 + C(\delta)$ . If candidate  $i_r \neq a^*$ , then  $a^*$  will be compared to all  $j \in \mathcal{A}$  (since  $a^* \notin D_r(i_r)$ ). On the other hand, if  $i_r = a^*$ , then (1) for any  $j \in D_r(a^*)$ , arm  $j$  is only compared to  $a^*$ , and (2) for any  $j \in \mathcal{A} \setminus D_r(a^*)$ , arm  $j$  is compared to all active arms including  $a^*$ .

Next, we show that for any round  $r \geq r(\delta) + 1$ , arm  $a^*$  defeats all other arms, i.e.,  $|D_r(a^*)| = |\mathcal{A}| - 1$ . This would imply that  $i_r = a^*$  and  $a^*$  is the champion. Consider any arm  $j \in \mathcal{A} \setminus a^*$ . Since  $a^*$  is compared to all active arms in round  $r-1 \geq r(\delta)$ , we have

$$N_{a^*,j}(r-1) \geq q^{r-1} > \frac{8}{\Delta_{\min}^2} \cdot \log(2K^2 q_{r-1}),$$

where the second inequality is by Lemma 3.6 with  $r-1 \geq r(\delta)$ . Now, by definition, we have

$$c_{a^*,j}(r-1) = \sqrt{\frac{2 \log(2K^2 q_{r-1})}{N_{a^*,j}(r-1)}} < \sqrt{\frac{2 \log(2K^2 q_{r-1})}{\frac{8}{\Delta_{\min}^2} \log(2K^2 q_{r-1})}} = \frac{\Delta_{\min}}{2}.$$

Given this, it is easy to show that  $a^*$  defeats arm  $j$  in round  $r$ . Conditioned on  $E(\delta)$ , we know that  $|\widehat{p}_{a^*,j}(r-1) - p_{a^*,j}| \leq c_{a^*,j}(r-1) \leq \frac{\Delta_{\min}}{2}$ . Then, we have

$$\widehat{p}_{a^*,j}(r-1) \geq p_{a^*,j} - \frac{\Delta_{\min}}{2} = \frac{1}{2} + \Delta_j - \frac{\Delta_{\min}}{2} \geq \frac{1}{2} + \frac{\Delta_{\min}}{2} > \frac{1}{2} + c_{a^*,j}(r-1).$$

Therefore,  $j \in D_r(a^*)$ . It now follows that for any round  $r \geq r(\delta) + 1$ , arm  $a^*$  is the champion.  $\square$

*Proof of Theorem 1.1* First, recall that in round  $r$  of C2B, any pair is compared  $q_r = \lfloor q^r \rfloor$  times where  $q = T^{1/B}$ . Since  $q^B = T$ , C2B uses at most  $B$  rounds.

For the rest of proof, we fix  $\delta > 0$ . We now analyze the regret incurred by C2B, conditioned on events  $G$  and  $E(\delta)$ . Recall that  $\mathbf{P}(G) \geq 1 - 1/T$  (Lemma 3.2), and  $\mathbf{P}(E(\delta)) \geq 1 - \delta$  (Lemma 3.4). Thus,  $\mathbf{P}(G \cap E(\delta)) \geq 1 - \delta - 1/T$ . Let  $R_1$  and  $R_2$  denote the regret incurred before and after round  $r(\delta)$  (see Definition 3.4) respectively.

**Bounding  $R_1$ .** This is the regret incurred up to (and including) round  $r(\delta)$ . We upper bound the regret by considering all pairwise comparisons every round  $r \leq r(\delta)$ .

$$\begin{aligned} R_1 &\leq K^2 \cdot \sum_{r \leq r(\delta)} q_r \leq K^2 \cdot \sum_{r \leq r(\delta)} q^r \leq 2K^2 \cdot q^{r(\delta)} \\ &\leq 2K^2 \cdot \max \left\{ q \cdot 2A \log A, q^{C(\delta)+1} \right\}, \end{aligned}$$

where the last inequality uses Definition 3.4 recall  $A = \frac{16}{\Delta_{\min}^2} \cdot \log(2K^2)$ . Plugging in the value of  $C(\delta) \leq 1 + \frac{1}{2} \log_q(1/\delta)$ , we obtain

$$R_1 \leq O(K^2) \cdot \max \left\{ q \cdot \frac{\log K}{\Delta_{\min}^2} \cdot \log \left( \frac{\log K}{\Delta_{\min}} \right), q^2 \sqrt{\frac{1}{\delta}} \right\}. \quad (5)$$

**Bounding  $R_2$ .** This is the regret in rounds  $r \geq r(\delta) + 1$ . By Lemma 3.7 arm  $a^*$  is the champion in all these rounds. So, the only comparisons in these rounds are of the form  $(a^*, j)$  for  $j \in \mathcal{A}$ .

Consider any arm  $j \neq a^*$ . Let  $T_j$  be the total number of comparisons that  $j$  participates in after round  $r(\delta)$ . Let  $r$  be the penultimate round that  $j$  is played in. We can assume that  $r \geq r(\delta)$  (otherwise arm  $j$  will never participate in rounds after  $r(\delta)$ , i.e.,  $T_j = 0$ ). As arm  $j$  is *not* eliminated after round  $r$ ,

$$\hat{p}_{a^*,j}(r) \leq \frac{1}{2} + \gamma_{a^*,j}(r).$$

Moreover, by  $E(\delta)$ , we have  $\hat{p}_{a^*,j}(r) \geq p_{a^*,j} - c_{a^*,j}(r)$  because  $r \geq r(\delta) \geq C(\delta)$ . So,

$$\frac{1}{2} + \Delta_j = p_{a^*,j} \leq \hat{p}_{a^*,j}(r) + c_{a^*,j}(r) \leq \frac{1}{2} + \gamma_{a^*,j}(r) + c_{a^*,j}(r).$$

It follows that

$$\Delta_j \leq \gamma_{a^*,j}(r) + c_{a^*,j}(r) \leq \frac{3}{\sqrt{2}} \sqrt{\frac{\log(2K^2 BT)}{N_{a^*,j}(r)}}$$

where the final inequality follows by definition of  $c$  and  $\gamma$ . On re-arranging, we get  $N_{a^*,j}(r) \leq \frac{9 \log(2K^2 BT)}{2\Delta_j^2}$ . As  $r+1$  is the last round that  $j$  is played in, and  $j$  is only compared to  $a^*$  in each round after  $r(\delta)$ ,

$$T_j \leq N_{a^*,j}(r+1) \leq N_{a^*,j}(r) + 2q \cdot N_{a^*,j}(r) \leq \frac{15q \cdot \log(2K^2 BT)}{\Delta_j^2}.$$

The second inequality follows since  $j$  is compared to  $a^*$  in rounds  $r$  and  $r+1$ , and the number of comparisons in round  $r+1$  is  $\lfloor q^{r+1} \rfloor \leq q \cdot (2q^r) \leq 2q \cdot N_{a^*,j}(r)$ . Adding over all arms  $j$ , the total regret accumulated beyond round  $r(\delta)$  is

$$R_2 = \sum_{j \neq a^*} T_j \Delta_j \leq \sum_{j \neq a^*} O \left( \frac{q \cdot \log(KT)}{\Delta_j} \right). \quad (6)$$

Combining (5) and (6), and using  $q = T^{1/B}$ , we obtain

$$\begin{aligned} R(T) &\leq O \left( T^{1/B} \cdot \frac{K^2 \log(K)}{\Delta_{\min}^2} \cdot \log \left( \frac{\log K}{\Delta_{\min}} \right) \right) + O \left( T^{2/B} \cdot K^2 \cdot \sqrt{\frac{1}{\delta}} \right) \\ &\quad + \sum_{j \neq a^*} O \left( \frac{T^{1/B} \cdot \log(KT)}{\Delta_j} \right). \end{aligned}$$

This completes the proof Theorem 1.1 □

## D Expected Regret Bound

In this section, we present the proof of Theorem 1.2. We first state the definitions needed in the proof. Let  $F_X(\cdot)$  denote the cumulative density function (CDF) of a random variable  $X$ ; that is,  $F_X(x) = \mathbf{P}(X \leq x)$ . The inverse CDF of  $X$ , denoted  $F_X^{-1}$ , is defined as  $F_X^{-1}(z) = \inf\{x : \mathbf{P}(X \leq x) \geq z\}$  where  $z \in [0, 1]$ . We will use the identity  $\mathbb{E}[X] = \int_0^1 F_X^{-1}(z) dz$ .

*Proof of Theorem 1.2* First, note that in round  $r$  of C2B, any pair is compared  $q_r = \lfloor q^r \rfloor$  times where  $q = T^{1/B}$ . Since  $q^B = T$ , C2B uses at most  $B$  rounds.

Let  $R(T)$  be the random variable denoting the regret incurred by C2B. By Theorem 1.1 we know that with probability at least  $1 - \delta - 1/T$ ,

$$R(T) \leq O\left(T^{1/B} \cdot \frac{K^2 \log(K)}{\Delta_{\min}^2} \cdot \log\left(\frac{\log K}{\Delta_{\min}}\right)\right) + O\left(T^{2/B} \cdot K^2 \cdot \sqrt{\frac{1}{\delta}}\right) + \sum_{j \neq a^*} O\left(\frac{T^{1/B} \cdot \log(KT)}{\Delta_j}\right).$$

Thus,  $F_{R(T)}^{-1}(1 - \delta - 1/T) \leq G(\delta)$  where

$$G(\delta) := A + O\left(T^{2/B} \cdot K^2 \cdot \sqrt{\frac{1}{\delta}}\right) + B$$

where to simplify notation we set  $A = O\left(T^{1/B} \cdot \frac{K^2 \log(K)}{\Delta_{\min}^2} \cdot \log\left(\frac{\log K}{\Delta_{\min}}\right)\right)$  and  $B = \sum_{j \neq a^*} O\left(\frac{T^{1/B} \cdot \log(KT)}{\Delta_j}\right)$ . Using the identity for expectation of a random variable, we get

$$\begin{aligned} \mathbb{E}[R(T)] &= \int_0^1 F_{R(T)}^{-1}(z) dz \\ &= \int_0^{1-\frac{1}{T}} F_{R(T)}^{-1}(z) dz + \underbrace{\int_{1-\frac{1}{T}}^T F_{R(T)}^{-1}(z) dz}_{\leq T \cdot \frac{1}{T} = 1} \\ &\leq \int_0^{1-\frac{1}{T}} F_{R(T)}^{-1}(z) dz + 1 \\ &= \int_{1-\frac{1}{T}}^0 F_{R(T)}^{-1}\left(1 - \delta - \frac{1}{T}\right) (-d\delta) + 1 \\ &\leq \int_0^{1-\frac{1}{T}} G(\delta) d\delta + 1 \\ &\leq A + O\left(T^{2/B} \cdot K^2\right) + B + 1 \end{aligned}$$

where the fourth equality follows by setting  $1 - q - 1/T = \delta$  and the final inequality follows since  $\int_0^1 \left(\frac{1}{\delta}\right)^{1/2} \leq 2$ . Thus,

$$\mathbb{E}[R(T)] \leq O\left(T^{1/B} \cdot \frac{K^2 \log(K)}{\Delta_{\min}^2} \cdot \log\left(\frac{\log K}{\Delta_{\min}}\right)\right) + O\left(T^{2/B} \cdot K^2\right) + \sum_{j \neq a^*} O\left(\frac{T^{1/B} \cdot \log(KT)}{\Delta_j}\right).$$

This completes the proof of Theorem 1.2 □

## E The Batched Algorithm with KL-based Elimination Criterion

In this section, we modify C2B to use a Kullback-Leibler divergence based elimination criterion. We provide a complete description of the algorithm, denoted C2B-KL, in Algorithm 2. In what follows, we highlight the main differences of C2B-KL from C2B. Recall the following notation. We use  $\mathcal{A}$  to denote the current set of *active* arms; i.e., the arms that have not been eliminated. We use index  $r$  for rounds or batches. If pair  $(i, j)$  is compared in round  $r$ , it is compared  $q_r = \lfloor q^r \rfloor$  times where  $q = T^{1/B}$ . We define the following quantities at the *end* of each round  $r$ :

- $N_{i,j}(r)$  is the total number of times the pair  $(i, j)$  has been compared.
- $\hat{p}_{i,j}(r)$  is the frequentist estimate of  $p_{i,j}$ , i.e.,

$$\hat{p}_{i,j}(r) = \frac{\# i \text{ wins against } j \text{ until end of round } r}{N_{i,j}(r)}. \quad (7)$$

- A confidence-interval radius for each  $(i, j)$  pair:

$$c_{i,j}(r) = \sqrt{\frac{2 \log(2K^2 q_r)}{N_{i,j}(r)}}$$

- We define a term  $I_j(r)$  which, at a high-level, measures how unlikely it is for  $j$  to be the Condorcet winner at the end of batch  $r$ :

$$I_j(r) = \sum_{i: \hat{p}_{i,j}(r) \geq \frac{1}{2}} D_{\text{KL}}\left(\hat{p}_{i,j}(r), \frac{1}{2}\right) \cdot N_{i,j}(r),$$

where  $D_{\text{KL}}(p, q)$  denotes the Kullback–Leibler divergence between two Bernoulli distributions:  $B(p)$  and  $B(q)$ . We define  $I^*(r) = \min_{j \in \mathcal{A}} I_j(r)$ .

The  $B$ -round algorithm, C2B-KL, proceeds exactly as C2B. The only change is in the *elimination criterion*, which we describe next.

**Elimination Criterion.** In round  $r$ , if, for any arm  $j$ , we have  $I_j(r) - I^*(r) > \log(T) + f(K)$ , then  $j$  is eliminated from  $\mathcal{A}$ . Here  $f(K)$  is a non-negative function of  $K$ , independent of  $r$ .

The main result of this section is to show that C2B-KL achieves the following guarantee.

**Theorem E.1.** *For any integer  $B \geq 1$ , there is an algorithm for the  $K$ -armed dueling bandit problem that uses at most  $B$  rounds. Furthermore, for any  $\delta > 0$ , with probability at least  $1 - \delta - \frac{1}{T} \cdot e^{K \log(C) - f(K)}$ , where  $C$  is some constant (see Lemma E.2), its regret under the Condorcet condition is at most*

$$R(T) \leq O\left(T^{1/B} \cdot \frac{K^2 \log(K)}{\Delta_{\min}^2} \cdot \log\left(\frac{\log K}{\Delta_{\min}}\right)\right) + O\left(T^{2/B} \cdot K^2 \cdot \sqrt{\frac{1}{\delta}}\right) + \sum_{j \neq a^*} O\left(\frac{T^{1/B} \cdot \log(T)}{\Delta_j}\right) + \sum_{j \neq a^*} O\left(\frac{T^{1/B} \cdot f(K)}{\Delta_j}\right)$$

**Remark.** Setting  $f(K) > K \log(C)$ , we get the same asymptotic expected regret bound as in Theorem 1.2. Following [35], we set  $f(K) = 0.3K^{1.01}$  in our experiments.

We require the following result in the proof of Theorem E.1.

**Fact E.1.** *For any  $\mu$  and  $\mu_2$  satisfying  $0 < \mu_2 < \mu < 1$ . Let  $C_1(\mu, \mu_2) = (\mu - \mu_2)^2 / (2\mu(1 - \mu_2))$ . Then, for any  $\mu_3 \leq \mu_2$ ,*

$$D_{\text{KL}}(\mu_3, \mu) - D_{\text{KL}}(\mu_3, \mu_2) \geq C_1(\mu, \mu_2) > 0.$$

The high-level outline of the analysis is exactly the same as that of C2B. For completeness, we provide the analysis in the following section; however, we skip the proofs of lemmas that follow from the analysis of C2B.

---

**Algorithm 2** C2B-KL

---

```
1: Input: Arms  $\mathcal{B}$ , time-horizon  $T$ , integer  $B \geq 1$ 
2: active arms  $\mathcal{A} \leftarrow \mathcal{B}$ ,  $r \leftarrow 1$ , empirical probabilities  $\hat{p}_{i,j}(0) = \frac{1}{2}$  for all  $i, j \in \mathcal{B}^2$ 
3: while number of comparisons  $\leq T$  do
4:   if  $\mathcal{A} = \{i\}$  for some  $i$  then play  $(i, i)$  for remaining trials
5:    $D_r(i) \leftarrow \{j \in \mathcal{A} : \hat{p}_{i,j}(r-1) > \frac{1}{2} + c_{i,j}(r-1)\}$ 
6:    $i_r \leftarrow \arg \max_{i \in \mathcal{A}} |D_r(i)|$ 
7:   for  $i \in \mathcal{A} \setminus \{i_r\}$  do
8:     if  $i \in D_r(i_r)$  then
9:       compare  $(i_r, i)$  for  $q_r$  times
10:    else
11:      for each  $j \in \mathcal{A}$ , compare  $(i, j)$  for  $q_r$  times
12:    compute  $\hat{p}_{i,j}(r)$  values
13:    if  $\exists j : I_j(r) - I^*(r) > \log(T) + f(K)$  then
14:       $\mathcal{A} \leftarrow \mathcal{A} \setminus \{j\}$ 
15:       $r \leftarrow r + 1$ 
```

---

### E.1 The Analysis

In this section, we prove the high-probability regret bound for C2B-KL. Recall that  $q = T^{1/B}$ , and that  $q \geq 2$ . We first show that, with high probability,  $a^*$  is not eliminated during the execution of the algorithm. The following lemma formalizes this.

**Lemma E.2.** *Let  $G$  denote the event that the best arm  $a^*$  is not eliminated during the execution of C2B-KL. We can bound the probability of  $\overline{G}$  as follows.*

$$\mathbf{P}(\overline{G}) \leq \frac{1}{T} \cdot e^{K \log(C) - f(K)},$$

where  $C = \max_j C(j) + 1$ , is a constant, with  $C(j) = \left( \frac{1}{e^{D_{\text{KL}}(p_{j,a^*,1/2}) - 1}} + \frac{e^{C_1(p_{a^*,j,1/2})}}{(e^{C_1(p_{a^*,j,1/2})} - 1)^2} \right)$ .

*Proof.* Let  $n_j$  denote the number of times  $a^*$  and  $j$  are compared. Let  $\hat{p}_{a^*,j}(n_j)$  denote the frequentist estimate of  $p_{a^*,j}$  when  $a^*$  and  $j$  are compared  $n_j$  times (we will abuse notation and use  $\hat{p}_{a^*,j}$  when  $n_j$  is clear from context). Let  $S \in 2^{[K] \setminus \{a^*\}} \setminus \emptyset$ , and consider vector  $\{n_j \in \mathbb{N} : j \in S\}$ . We define  $A = \sum_{j \in S} D_{\text{KL}}(\hat{p}_{j,a^*}, 1/2) \cdot n_j$ . Let  $D(S; \{n_j : j \in S\})$  denote the event that  $a^*$  and  $j$  are compared  $n_j$  times and  $\hat{p}_{a^*,j} \leq 1/2$  for all  $j \in S$ , and that  $A > \log(T) + f(K)$ . The probability of this event upper bounds the probability that  $a^*$  is eliminated (as per our elimination criterion) when  $a^*$  and  $j$  are compared  $n_j$  times, and  $\hat{p}_{a^*,j} \leq 1/2$  for all  $j \in S$ . We will show that

$$\mathbf{P}(D(S; \{n_j : j \in S\})) \leq \frac{e^{-f(K)}}{T} \prod_{j \in S} \left( e^{-n_j D_{\text{KL}}(p_{j,a^*,1/2})} + n_j e^{C_1(p_{j,a^*,1/2})} \right) \quad (8)$$

where  $C_1(\mu_1, \mu_2) = (\mu_1 - \mu_2)^2 / (2\mu_1(1 - \mu_2))$ . Using the above, we first show that by taking a union bound over all  $S \in 2^{[K] \setminus \{a^*\}} \setminus \emptyset$  and  $\{n_j : j \in S\}$ , we obtain the final result. We have

$$\begin{aligned} \mathbf{P}(\overline{G}) &\leq \sum_{S \in 2^{[K] \setminus \{a^*\}} \setminus \emptyset} \sum_{n_j \in \mathbb{N}^{|S|}} \mathbf{P}(D(S; \{n_j : j \in S\})) \\ &\leq \sum_{S \in 2^{[K] \setminus \{a^*\}} \setminus \emptyset} \sum_{n_j \in \mathbb{N}^{|S|}} \frac{e^{-f(K)}}{T} \prod_{j \in S} \left( e^{-n_j D_{\text{KL}}(p_{j,a^*,1/2})} + n_j e^{C_1(p_{j,a^*,1/2})} \right) \\ &= \frac{e^{-f(K)}}{T} \sum_{S \in 2^{[K] \setminus \{a^*\}} \setminus \emptyset} \prod_{j \in S} \sum_{n_j \in \mathbb{N}} \left( e^{-n_j D_{\text{KL}}(p_{j,a^*,1/2})} + n_j e^{C_1(p_{j,a^*,1/2})} \right) \end{aligned} \quad (9)$$

$$= \frac{e^{-f(K)}}{T} \sum_{S \in 2^{[K] \setminus \{a^*\}} \setminus \emptyset} \prod_{j \in S} \left( \frac{1}{e^{D_{\text{KL}}(p_{j,a^*,1/2})} - 1} + \frac{e^{C_1(p_{j,a^*,1/2})}}{(e^{C_1(p_{j,a^*,1/2})} - 1)^2} \right) \quad (10)$$

$$\leq \frac{e^{-f(K)}}{T} \sum_{S \in 2^{[K] \setminus \{a^*\}} \setminus \emptyset} (C - 1)^{|S|} \leq \frac{e^{-f(K)}}{T} \cdot C^K \quad (11)$$

$$= \frac{1}{T} \cdot e^{K \log(C) - f(K)}$$

where (9) follows by swapping the order of summation and multiplication, (10) uses  $\sum_{n=1}^{\infty} e^{-nx} = 1/(e^x - 1)$  and  $\sum_{n=1}^{\infty} n e^{-nx} = e^x / (e^x - 1)^2$ , and (11) follows by letting

$$C(j) = \left( \frac{1}{e^{D_{\text{KL}}(p_{j,a^*,1/2})} - 1} + \frac{e^{C_1(p_{j,a^*,1/2})}}{(e^{C_1(p_{j,a^*,1/2})} - 1)^2} \right), C = \max_j C(j) + 1 \text{ and the binomial theorem.}$$

To complete the proof, we need to prove (8).

For the remainder of this proof, we fix  $S \in 2^{[K] \setminus \{a^*\}} \setminus \emptyset$ , and vector  $\{n_j \in \mathbb{N} : j \in S\}$ . Observe that

$$\mathbf{P}(D(S; \{n_j : j \in S\})) = \mathbf{P}(A > \log(T) + f(K)) = \mathbf{P}(T < e^{-f(K)} \cdot e^A)$$

where we defined  $A = \sum_{j \in S} D_{\text{KL}}(\hat{p}_{j,a^*}, 1/2) \cdot n_j$ . By Markov's inequality, we have

$$\mathbf{P}(e^{-f(K)} \cdot e^A > T) \leq \frac{\mathbb{E}[e^{-f(K)} \cdot e^A]}{T} = \frac{e^{-f(K)}}{T} \cdot \mathbb{E}[e^A] \quad (12)$$

where the last equality follows since  $f(K)$  is constant (with respect to  $\{n_j\}$  values). So, it suffices to bound  $\mathbb{E}[e^A]$ . Towards this end, we define the following term:

$$P_j(x_j) = \mathbf{P}\left(\hat{p}_{j,a^*} \geq \frac{1}{2} \text{ and } D_{\text{KL}}\left(\hat{p}_{j,a^*}, \frac{1}{2}\right) \geq x_j\right).$$

Then, we have

$$\begin{aligned}\mathbb{E}[e^A] &= \int_{\{x_j\} \in [0, \log(2)]^{|S|}} \exp\left(\sum_{j \in S} n_j x_j\right) \prod_{j \in S} d(-P_j(x_j)) \\ &= \prod_{j \in S} \int_{x_j \in [0, \log(2)]} e^{n_j x_j} d(-P_j(x_j))\end{aligned}\quad (13)$$

$$= \prod_{j \in S} \left( [-e^{n_j x_j} P_j(x_j)]_0^{\log(2)} + \int_{x_j \in [0, \log(2)]} n_j e^{n_j x_j} P_j(x_j) dx_j \right) \quad (14)$$

$$= \prod_{j \in S} \left( P_j(0) + \int_{x_j \in [0, \log(2)]} n_j e^{n_j x_j} P_j(x_j) dx_j \right) \\ \leq \prod_{j \in S} \left( e^{-n_j D_{\text{KL}}(p_{j,a^*}, 1/2)} + \int_{x_j \in [0, \log(2)]} n_j e^{n_j x_j} e^{-n_j(x_j + C_1(p_{j,a^*}, 1/2))} dx_j \right) \quad (15)$$

$$= \prod_{j \in S} \left( e^{-n_j D_{\text{KL}}(p_{j,a^*}, 1/2)} + \int_{x_j \in [0, \log(2)]} n_j e^{C_1(p_{j,a^*}, 1/2)} dx_j \right) \\ \leq \prod_{j \in S} \left( e^{-n_j D_{\text{KL}}(p_{j,a^*}, 1/2)} + n_j e^{C_1(p_{j,a^*}, 1/2)} \right)$$

where (13) follows from the independence of the comparisons. We obtain (14) by applying integration by parts, (15) follows from the Chernoff bound and Fact E.1 here  $C_1(\mu_1, \mu_2) = (\mu_1 - \mu_2)^2 / (2\mu_1(1 - \mu_2))$ , and the final inequality follows by observing that  $\int_{x_j \in [0, \log(2)]} n_j e^{C_1(p_{j,a^*}, 1/2)} dx_j = n_j e^{C_1(p_{j,a^*}, 1/2)} \cdot \int_{x_j \in [0, \log(2)]} dx_j = n_j e^{C_1(p_{j,a^*}, 1/2)} \log(2)$ . Note that  $\log$  refers to the natural logarithm, so we have  $\log(2) \leq 1$ . Combined with (12), this completes the proof of (8).  $\square$

### E.1.1 High-probability Regret Bound

We now prove Theorem E.1 Fix any  $\delta > 0$ . We first define event  $E(\delta)$  as before.

**Definition E.1** (Event  $E(\delta)$ ). *An estimate  $\hat{p}_{i,j}(r)$  in batch  $r$  is **weakly-correct** if  $|\hat{p}_{i,j}(r) - p_{i,j}| \leq c_{i,j}(r)$ . Let  $C(\delta) := \lceil \frac{1}{2} \log_q(1/\delta) \rceil$ . We say that event  $E(\delta)$  occurs if for each batch  $r \geq C(\delta)$ , every estimate is weakly-correct.*

The next lemma shows that  $E(\delta)$  occurs with probability at least  $1 - \delta$ . Since  $E(\delta)$  does not depend on the elimination criterion, its proof follows from the analysis of C2B.

**Lemma E.3.** *For all  $\delta > 0$ , we have*

$$\mathbf{P}(\neg E(\delta)) = \mathbf{P}(\exists r \geq C(\delta), i, j : |\hat{p}_{i,j}(r) - p_{i,j}| > c_{i,j}(r)) \leq \delta.$$

As before, we analyze our algorithm under both events  $G$  and  $E(\delta)$ . Recall that, under event  $G$ , the best arm  $a^*$  is not eliminated. *Conditioned on these*, we next show:

- The best arm,  $a^*$ , is *not defeated* by any arm  $i$  in any round  $r > C(\delta)$  (Lemma E.4).
- Furthermore, there exists a round  $r(\delta) \geq C(\delta)$  such that arm  $a^*$  defeats *every other arm*, in every round after  $r(\delta)$  (Lemma E.6).

We re-state the formal lemmas next.

**Lemma E.4.** *Conditioned on  $G$  and  $E(\delta)$ , for any round  $r > C(\delta)$ , arm  $a^*$  is not defeated by any other arm, i.e.,  $a^* \notin \cup_{i \neq a^*} D_r(i)$ .*

To proceed, we need the following definitions.

**Definition E.2.** *The candidate  $i_r$  of round  $r$  is called the **champion** if  $|D_r(i_r)| = |\mathcal{A}| - 1$ ; that is, if  $i_r$  defeats every other active arm.*



**Definition E.3.** Let  $r(\delta) \geq C(\delta) + 1$  be the smallest integer such that

$$q^{r(\delta)} \geq 2A \log A, \quad \text{where } A := \frac{32}{\Delta_{\min}^2} \cdot \log(2K^2).$$

We use the following inequality based on this choice of  $r(\delta)$ .

**Lemma E.5.** The above choice of  $r(\delta)$  satisfies

$$q^r > \frac{8}{\Delta_{\min}^2} \cdot \log(2K^2 q_r), \quad \forall r \geq r(\delta).$$

Then, we have the following.

**Lemma E.6.** Conditioned on  $G$  and  $E(\delta)$ , the best arm  $a^*$  is the champion in every round  $r > r(\delta)$ .

We are now ready to prove Theorem [E.1](#)

*Proof of Theorem [E.1](#)* First, recall that in round  $r$  of C2B, any pair is compared  $q_r = \lfloor q^r \rfloor$  times where  $q = T^{1/B}$ . Since  $q^B = T$ , C2B uses at most  $B$  rounds.

For the rest of proof, we fix  $\delta > 0$ . We now analyze the regret incurred by C2B, conditioned on events  $G$  and  $E(\delta)$ . Recall that  $\mathbf{P}(G) \geq 1 - \frac{1}{T} \cdot e^{K \log(C) - f(K)}$  (Lemma [E.2](#)), and  $\mathbf{P}(E(\delta)) \geq 1 - \delta$  (Lemma [E.3](#)). Thus,  $\mathbf{P}(G \cap E(\delta)) \geq 1 - \delta - \frac{1}{T} \cdot e^{K \log(C) - f(K)}$ . Let  $R_1$  and  $R_2$  denote the regret incurred before and after round  $r(\delta)$  (see Definition [E.3](#)) respectively.

**Bounding  $R_1$ .** We can bound  $R_1$  as in the proof of Theorem [1.1](#) so, we get

$$R_1 \leq O(K^2) \cdot \max \left\{ q \cdot \frac{\log K}{\Delta_{\min}^2} \cdot \log \left( \frac{\log K}{\Delta_{\min}} \right), q^2 \sqrt{\frac{1}{\delta}} \right\}. \quad (16)$$

**Bounding  $R_2$ .** This is the regret in rounds  $r \geq r(\delta) + 1$ . By Lemma [E.6](#) arm  $a^*$  is the champion in all these rounds. So, the only comparisons in these rounds are of the form  $(a^*, j)$  for  $j \in \mathcal{A}$ .

Consider any arm  $j \neq a^*$ . Let  $T_j$  be the total number of comparisons that  $j$  participates in after round  $r(\delta)$ . Let  $r$  be the penultimate round that  $j$  is played in. We can assume that  $r \geq r(\delta)$  (otherwise arm  $j$  will never participate in rounds after  $r(\delta)$ , i.e.,  $T_j = 0$ ). As arm  $j$  is *not* eliminated after round  $r$ ,

$$I_j(r) - I^*(r) \leq \log(T) + f(K).$$

By Lemma [E.6](#)  $I^*(r) = 0$  (since  $a^*$  is the *champion*, the summation is empty). So, we have  $I_j(r) \leq \log(T) + f(K)$ . Observe that

$$I_j(r) \geq D_{\text{KL}} \left( \hat{p}_{a^*,j}(r), \frac{1}{2} \right) N_{a^*,j}(r) \quad (17)$$

We can lower bound  $D_{\text{KL}} \left( \hat{p}_{a^*,j}(r), \frac{1}{2} \right)$  as follows.

$$D_{\text{KL}} \left( \hat{p}_{a^*,j}(r), \frac{1}{2} \right) \geq \left( \hat{p}_{a^*,j}(r) - \frac{1}{2} \right)^2 \geq \left( p_{a^*,j} - c_{a^*,j}(r) - \frac{1}{2} \right)^2 \geq \left( \frac{\Delta_j}{2} \right)^2$$

where the first inequality follows from Pinsker's inequality, the second inequality uses Lemma [E.3](#) and the final inequality uses the fact that  $c_{a^*,j}(r) \leq \frac{\Delta_{\min}}{2}$ , which follows by the choice of  $r(\delta)$ . Plugging this into [\(17\)](#), we get

$$\frac{\Delta_j^2}{4} \cdot N_{a^*,j}(r) \leq \log(T) + f(K)$$

which on re-arranging gives

$$N_{a^*,j}(r) \leq \frac{4(\log(T) + f(K))}{\Delta_j^2}.$$

As  $r + 1$  is the last round that  $j$  is played in, and  $j$  is only compared to  $a^*$  in each round after  $r(\delta)$ ,

$$T_j \leq N_{a^*,j}(r+1) \leq N_{a^*,j}(r) + 2q \cdot N_{a^*,j}(r) \leq \frac{12q \cdot (\log(T) + f(K))}{\Delta_j^2}.$$

The second inequality follows since  $j$  is compared to  $a^*$  in rounds  $r$  and  $r + 1$ , and the number of comparisons in round  $r + 1$  is  $\lfloor q^{r+1} \rfloor \leq q \cdot (2q_r) \leq 2q \cdot N_{a^*,j}(r)$ . Adding over all arms  $j$ , the total regret accumulated beyond round  $r(\delta)$  is

$$R_2 = \sum_{j \neq a^*} T_j \Delta_j \leq \sum_{j \neq a^*} O\left(\frac{q \cdot (\log(T) + f(K))}{\Delta_j}\right). \quad (18)$$

Combining (16) and (18), and using  $q = T^{1/B}$ , we obtain

$$R(T) \leq O\left(T^{1/B} \cdot \frac{K^2 \log(K)}{\Delta_{\min}^2} \cdot \log\left(\frac{\log K}{\Delta_{\min}}\right)\right) + O\left(T^{2/B} \cdot K^2 \cdot \sqrt{\frac{1}{\delta}}\right) + \sum_{j \neq a^*} O\left(\frac{T^{1/B} \cdot \log(T)}{\Delta_j}\right) + \sum_{j \neq a^*} O\left(\frac{T^{1/B} \cdot f(K)}{\Delta_j}\right)$$

This completes the proof Theorem E.1 □

## F Hardware Specification for Computational Experiments

We conducted our computations using C++ and Python 2.7 with a 2.3 Ghz Intel Core i5 processor and 16 GB 2133 MHz LPDDR3 memory.
